1 **Protein tyrosine phosphatase-PEST (PTP-PEST) mediates hypoxia-**  
2 **induced endothelial autophagy and angiogenesis through AMPK**  
3 **activation.**

4 Shivam Chandel<sup>1</sup>, Amrutha Manikandan<sup>1</sup>, Nikunj Mehta<sup>1</sup>, Abel Arul Nathan<sup>1</sup>, Rakesh  
5 Kumar Tiwari<sup>1</sup>, Samar Bhallabha Mohapatra<sup>1</sup>, Mahesh Chandran<sup>2</sup>, Abdul Jaleel<sup>2</sup>,  
6 Narayanan Manoj<sup>1</sup> and Madhulika Dixit<sup>1</sup>.

7

8 1. Department of Biotechnology,  
9 Bhupat and Jyoti Mehta School of Biosciences,  
10 Indian Institute of Technology Madras (IIT Madras),  
11 Chennai, INDIA, 600036

12 2. Rajiv Gandhi Centre for Biotechnology (RGCB),  
13 Thyacaud Post, Thiruvananthpuram,  
14 Kerala, INDIA, 695014

15

16 **Corresponding Author:**

17 Madhulika Dixit  
18 Department of Biotechnology,  
19 Bhupat and Jyoti Mehta School of Biosciences,  
20 Indian Institute of Technology Madras  
21 Chennai, INDIA, 600036

22

23 Phone: +91-44-22574131

24 E-mail: mdixit@iitm.ac.in

25

26 **Abstract:**

27 Global and endothelial loss of PTP-PEST is associated with impaired cardiovascular  
28 development and embryonic lethality. Although hypoxia is implicated in vascular  
29 morphogenesis and remodelling, its effect on PTP-PEST remains unexplored. Here we  
30 report that hypoxia (1% oxygen) increases protein levels and catalytic activity of PTP-  
31 PEST in primary endothelial cells. Immunoprecipitation followed by mass spectrometry  
32 (LC/MS/MS) revealed that AMP-activated protein kinase alpha subunits (AMPK  $\alpha_1$  and  
33  $\alpha_2$ ) interact with PTP-PEST under normoxia but not in hypoxia. Co-immunoprecipitation  
34 experiments confirmed this observation and determined that AMPK  $\alpha$  subunits interact  
35 with the catalytic domain of PTP-PEST. Knock-down of PTP-PEST abrogated hypoxia  
36 mediated tyrosine dephosphorylation and activation of AMPK (Thr<sup>172</sup> phosphorylation).  
37 Absence of PTP-PEST also blocked hypoxia-induced autophagy (measured as LC3  
38 degradation and puncta formation) which was rescued by AMPK activator, metformin  
39 (500 $\mu$ M). Since endothelial autophagy is a pre-requisite for angiogenesis, knock-down  
40 of PTP-PEST also attenuated endothelial cell migration and capillary tube formation  
41 with autophagy inducer rapamycin (200nM) rescuing these effects. In conclusion, this  
42 work identifies for the first time PTP-PEST as a regulator of hypoxia-induced AMPK  
43 activation and endothelial autophagy to promote angiogenesis.

44

45

46 **Key words:** PTP-PEST, hypoxia, AMPK, autophagy, angiogenesis

47

## 48 **Introduction:**

49 Physiological hypoxia is a potent agonist for embryonic development and post-natal  
50 angiogenesis. Oxygen concentrations ranging from 1% to 5% are observed in the  
51 uterine environment between embryonic days 3.5 to 14.5 (E3.5-E14.5) to facilitate  
52 development of placenta. Similarly, in response to hypoxia (<2% oxygen), endocardial  
53 and vascular endothelial cells mediate formation of foetal heart and vasculature  
54 respectively in mice between embryonic days E7.5 to E15 [1;2]. Post-natal  
55 angiogenesis as seen in female reproductive tract during menstrual cycle in humans, as  
56 well as formation of collateral circulation to over-come coronary artery blocks also  
57 depend on hypoxia-induced endothelial signalling. Other than the known classical  
58 mediators of angiogenesis, multiple studies in rodents have reported increased activity  
59 of cytosolic protein tyrosine phosphatases (PTPs) at the sites of post-natal  
60 angiogenesis, including ischemic myocardium and skeletal muscles [3;4]. An increase  
61 in the cytosolic PTP activity during hypoxia is also seen in the cerebral cortex of new  
62 born piglets [5]. Paradoxically, others have shown that non-selective PTP inhibitor,  
63 sodium orthovanadate, enhances VEGFR2 signalling and capillary morphogenesis  
64 [3;6]. Although these studies allude to the involvement of different PTPs in hypoxia-  
65 induced angiogenic signalling, barring the involvement of few, for instance VE-PTP (a  
66 receptor PTP), the identity of hypoxia responsive cytosolic angiogenic PTPs remains  
67 largely unknown.

68

69 Human genome encodes 38 classical PTPs which are specific for tyrosine residues [7].  
70 Among these, PTP-PEST is a ubiquitously expressed cytosolic PTP with an N-terminal  
71 catalytic domain (1-300 amino acids) and a regulatory C-terminal PEST domain (301-  
72 780 amino acids) containing four PEST motifs. The latter plays a crucial role in protein-  
73 protein interaction allowing the enzyme to interact with its known substrates such as

74 Cas, Paxillin, FAK and Pyk2 in addition to being a protein degradation signal [8-10].  
75 The catalytic domain harbours the conserved phosphatase 'HC(X)<sub>5</sub>R' motif surrounded  
76 by the 'WPD loop' and the 'Q loop' on one side to assist in catalysis and by the 'P-Tyr-  
77 loop'on the other side to regulate substrate recognition and specificity [11]. Both global  
78 and endothelial deficiency of PTP-PEST in mice leads to embryonic lethality between  
79 E9.5-E10.5 days due to defective heart formation and impaired endothelial network in  
80 the yolk sac [12;13]. It is worth noting that this stage in embryonic development  
81 coincides with hypoxia-induced morphogenesis [1;2]. PTP-PEST appears to be crucial  
82 for vascular development even in humans since a partial deletion of PTP-PEST is  
83 associated with disrupted aortic arch development [14]. Intriguingly, in a recent study,  
84 enhanced endothelial expression of PTP-PST was indeed observed in the vascularized  
85 core of glioblastoma tumours with others demonstrating involvement of PTP-PEST in  
86 integrin mediated endothelial cell adhesion and migration [13;15]. Based on these  
87 observations which illustrate an essential role of PTP-PEST in vascular development  
88 and given the fact that hypoxia is indispensable for cardiovascular development and  
89 angiogenesis, in the present study we set out to determine the functional role of PTP-  
90 PEST in hypoxia-induced endothelial responses. We assessed the effect of hypoxia on  
91 the expression, activity and binding partners of PTP-PEST in primary human umbilical  
92 vein derived endothelial cells (HUVECs).

93

#### 94 **Materials and methods:**

95 Experimental procedure involving isolation of endothelial cells from umbilical cords was  
96 approved by the IIT-Madras Institutional Ethics Committees per the Indian Council of  
97 Medical Research (ICMR), Government of India guidelines. These guidelines are in  
98 accordance with the declaration of Helsinki, which was revised in 2000.

99 **Antibodies and Chemicals:** Tissue culture grade plastic ware was from Tarsons  
100 Products Pvt. Ltd., Kolkata, India. Antibodies against HIF-1 $\alpha$ , phospho-AMPK, total  
101 AMPK, LC3, phospho-ULK1, total ULK1, phospho-ACC, total ACC, PTP-PEST (AG10)  
102 and anti-phospho-tyrosine (P-Tyr-102) antibody were obtained from Cell Signaling  
103 Technology (CST), Boston, MA, USA. Dulbecco's modified Eagle's medium (DMEM)  
104 and MCDB131 were purchased from HiMedia<sup>TM</sup>, Mumbai, India and fetal bovine serum  
105 (FBS) was from Gibco, Thermo Fisher Scientific, Waltham, MA, USA. Unless specified  
106 otherwise rest of the molecular biology and biochemistry reagents were from Sigma, St.  
107 Louis, MO, USA.

108 **Cell culture:** HUVECs were isolated from freshly collected umbilical cords by  
109 collagenase digestion. They were cultured in fibronectin coated T25 flasks until  
110 monolayer was formed. MCDB131 medium with endothelial growth supplements was  
111 used for culturing HUVECs. All the experiments were performed in passage one. For  
112 cell lines HEK293, HeLa, Huh7 and HASMC, cells were cultured in DMEM with 10%  
113 FBS. For hypoxia exposure, cells were incubated in hypoxia incubator (5% CO<sub>2</sub>, 1% O<sub>2</sub>  
114 and 95% relative humidity) for specified duration. After degassing, the cell culture  
115 media used for hypoxia experiments was pre-equilibrated to the hypoxic environment  
116 prior to start of the experiment.

117 **Immunoblotting:** All the buffers used for washing and lysing of cells were degassed  
118 before use. Cells were washed with 1X cold PBS and lysed in buffer containing 50mM  
119 Tris-HCl (pH 7.5), 150mM NaCl, 1mM EDTA, 1mM EGTA, 1% TritonX-100, 0.1% SDS,  
120 1% sodium deoxycholate, 1mM PMSF and protease inhibitor cocktail from Sigma (St.  
121 Louis, MO, USA) followed by sonication for 1 min (30% amplitude, 3 second on/off  
122 cycle). 50  $\mu$ g worth total protein was resolved through 8% SDS-PAGE and transferred  
123 onto PVDF membrane. Blotted proteins were incubated with corresponding primary

124 antibodies at 4°C overnight followed by incubation with horseradish peroxidase  
125 conjugated secondary antibodies (Jackson ImmunoResearch, West Grove, PA, USA).  
126 Amersham ECL Western blotting detection reagent (GE Healthcare Life Sciences,  
127 USA) was used for detection. Image J version 1.45 (NIH, Bethesda, MD, USA) was  
128 used for densitometry analysis.

129 **Immunoprecipitation and phosphatase assay:** Cells were lysed in ice cold buffer  
130 containing 50mM Tris-HCl (pH 7.5), 150mM NaCl, 1mM EDTA, 1mM EGTA, 1% Triton-  
131 X 100, 2.5mM sodium pyrophosphate, 1mM  $\beta$ -glycerophosphate, 1mM sodium  
132 orthovanadate, protease inhibitor cocktail (Sigma, St. Louis, MO, USA) and  
133 phosphatase inhibitor cocktail 2 (Sigma, St. Louis, MO, USA) followed by 30 seconds of  
134 sonication. 300  $\mu$ g worth total protein was pre-cleared using protein A/G sepharose  
135 beads. This was followed by overnight incubation with PTP-PEST AG10 monoclonal  
136 antibody at 4°C. Protein-antibody complex was pulled down using protein A/G  
137 sepharose beads in sample buffer. Specific pull down of PTP-PEST was confirmed by  
138 employing corresponding IgG isotype antibody as negative control. For phosphatase  
139 assay elution was performed in assay buffer. Phosphatase assay was carried out in Na-  
140 acetate buffer [2mM EDTA and 1mM DTT, pH 5.0] at 30°C for 2 hours and 50mM pNPP  
141 was used as substrate. The catalytic activity was determined spectrophotometrically by  
142 measuring the amount of pNP (para-nitrophenol) generated from pNPP. pNP released  
143 was quantified by measuring absorbance at 420 nm.

144 **Lentivirus production and transduction:** pcDNA3.1 Flag-PTP-PEST plasmid  
145 construct was a kind gift from Dr. Zhimin Lu, Department of Neuro-oncology, The  
146 University of Texas M. D. Anderson Cancer Center, Houston, USA [16]. PTP-PEST  
147 was sub-cloned in pENTR4-GST-6P1 (Addgene#17741) lentivirus entry vector  
148 backbone at BamH1 and XbaI restriction sites followed by LR clonase mediated

149 gateway recombination in 3<sup>rd</sup> generation lentivirus destination vector pLenti CMV Puro  
150 Dest (Addgene#17452). shRNA oligos(Oligo 1:5'-

151 GATCCCACCAGAAGAATCCCAGAATCTCGAGATTCTGGGATTCTTCTGGTGGTTTT

152 TG-3' and Oligo 2:5'-

153 AGCTCAAAAACCACCAGAAGAATCCCAGAATCTCGAGATTCTGGGATTCTTCTGGT

154 GG-3') were annealed in annealing buffer (10mM Tris pH 8.0, 50mM NaCl, 1mM EDTA)

155 and cloned in pENTR/pSUPER<sup>+</sup> entry vector (Addgene#17338) which was recombined

156 into pLenti X1 Puro DEST (Addgene#17297). These lentivirus entry and destination

157 plasmids were a gift from Eric Campeau and Paul Kaufman [17]. For lentivirus

158 production, recombined expression vectors were co-transfected with packaging

159 plasmids pLP1, pLP2 and pVSVG in 293T cells. Supernatant was collected 48 hours

160 and 72 hours post-transfection and was concentrated through ultracentrifugation.

161 Lentiviral transduction was performed in HUVECs (P<sub>0</sub>) in low serum (5%) endothelial

162 growth medium at 70% confluency in presence of polybrene (6µg/ml) for 8 hours. This

163 was followed by a second round of transduction. 48 hours post-transduction, puromycin

164 (2µg/ml) selection was performed for next 3 days followed by splitting of cells for

165 experimental treatment.

166 **Immunofluorescence imaging:** Following appropriate experimental treatments,

167 HUVECs were washed with 1X PBS, followed by paraformaldehyde (0.4%) fixing and

168 cells were made permeable with 0.25% Triton X. Cells were blocked with 5% serum in

169 1X PBS followed by overnight staining with primary antibodies at 4°C. Cells were then

170 washed and incubated with fluorophore conjugated secondary antibodies (Thermo

171 Fisher Scientific, Waltham, MA, USA). Nuclei were counterstained with DAPI and

172 images were captured in LSM 700 Zeiss confocal microscope.

173 **Mass spectrometry:** HUVECs were transduced with N-terminal GST tagged PTP-  
174 PEST lentiviral particles. Post-transduction, same pool of cells was split and exposed to  
175 either normoxia or hypoxia for 24 hours. GST tagged PTP-PEST was pulled down via  
176 immunoprecipitation using GST antibody (Cell Signaling Technology, USA).  
177 Immunoprecipitated proteins were loaded on to SDS-PAGE. SDS-PAGE was done in  
178 such a way that the electrophoresis run was stopped the moment the entire sample  
179 entered the resolving gel. Each band approximately 5mm in size, visible after  
180 Coomassie Blue staining was excised and used for proteomics analysis. The  
181 proteomic profiling was performed by liquid chromatography mass spectrometry  
182 (LC/MS/MS) at the Mass Spectrometry and Proteomics Core facility of RGCB,  
183 Thiruvananthapuram. Briefly, the excised gel pieces were subjected to in-gel trypsin  
184 digestion using sequence grade trypsin (Sigma) as per Shevchenko et al 2006 [18].  
185 The LC/MS/MS analyses of the extracted tryptic peptides were performed in a SYNAPT  
186 G2 High Definition Mass Spectrometer (Waters, Manchester, UK), which is connected  
187 to a nanoACQUITY UPLC® chromatographic system (Waters) for the separation of  
188 peptides. The LC/MS acquired raw data was analyzed by Progenesis QI for  
189 Proteomics V3.0 (NonLinear Dynamics, Waters) for protein identification using the  
190 Human protein database downloaded from UniProt.

191 **Wound healing assay:** HUVECs were cultured as tight monolayer and a scratch was  
192 made to create a wound. Immediately after wound creation, scrapped cells were  
193 washed off and images were taken at the start as 0 hour. HUVECs were then incubated  
194 in presence of 5mM hydroxyurea (anti-proliferative molecule) for next 24 hours either in  
195 normoxia or 1% hypoxia condition and images were retaken at the same locations  
196 following incubation to assess migration. Area of wound closure in 24 hours was  
197 calculated by employing ImageJ software (NIH, Bethesda, MD, USA).



198 ***In vitro* tube formation assay:** Wells in a 96 well plate were coated with 80  $\mu$ l of  
199 growth factor free Matrigel and allowed to polymerize in CO<sub>2</sub> cell culture incubator.  
200 Following appropriate experimental treatment (hypoxia and/or knock-down) 15 x 10<sup>3</sup>  
201 cells were seeded onto each well and incubated for 16 hours in CO<sub>2</sub> cell culture  
202 incubator followed by imaging. Tube networks were analyzed by using angioanalyser  
203 feature of ImageJ software (NIH, Bethesda, MD, USA).

204 **Site directed mutagenesis:** Wild type PTP-PEST containing first 300 amino acids was  
205 PCR amplified using primers (Forward primer: 5'-  
206 CGCGGATCCATGGAGCAAGTGGAGATC-3', Reverse primer: 5'-  
207 CCGCTCGAGTCATAGTTGTAGCTGTTTTTC-3') and cloned in pET28a(+) bacterial  
208 expression vector between BamH1 and Xho1 restriction sites. Site directed  
209 mutagenesis was carried out to generate C231S mutant using following primers,  
210 forward primer: 5'-TGTATTCATTCCAGTGCAGGCTG-3', reverse primer: 5'-  
211 CAGCCTGCACTGGAATGAATACA-3'. Polymerase chain reaction (PCR) was  
212 performed using 10ng of His tagged PTP-PEST (WT) plasmid as template and followed  
213 by Dpn1 (New England Biolabs, UK) digestion for 2 hours at 37°C. Dpn1 digested PCR  
214 product was transformed into *E. coli* DH5 $\alpha$  ultra-competent cells. Positive clones were  
215 selected by kanamycin resistance and grown overnight in Luria Bertani (LB) broth with  
216 0.1 mg/ml kanamycin. These constructs encode for the first 300 amino acids along with  
217 an additional hexa-histidine tag at the N-terminal. Constructs (WT and C231S) were  
218 confirmed through DNA sequencing.

219 **Protein expression and purification:** *E. coli* strain BL21 codon plus RIL (DE3)  
220 harboring the relevant plasmid was grown overnight at 37°C in LB broth medium  
221 supplemented with kanamycin (0.1mg/ml) and chloramphenicol (0.034 mg/ml). 1% of  
222 this overnight culture was transferred into fresh medium with kanamycin and

223 chloramphenicol and grown until a cell density equivalent to an OD<sub>600</sub> of 0.6 was  
224 reached. Protein expression was induced with a final concentration of 1mM IPTG for 6  
225 h at 30 °C. Cells were then harvested by centrifugation at 4500xg for 10 min at 4°C,  
226 washed with MQ water and frozen at -20°C. Over-expressed proteins were purified  
227 using Immobilized Metal Affinity Chromatography (IMAC) based on the affinity of the  
228 hexa-histidine tag for Ni<sup>2+</sup> following cell lysis in lysis buffer (50 mM Tris-HCl, 200 mM  
229 NaCl, 1mM PMSF, pH 8.0).All subsequent steps were performed at 4°C. Cell lysis was  
230 achieved through sonication done thrice for 5 min with a pulse of 5 sec ‘on’ and 5 sec  
231 ‘off’, at 30% amplitude. The lysate was centrifuged at 4500xg for 30 min at 4°C. The  
232 supernatant was then applied to Ni<sup>2+</sup>-NTA (Nickel-Nitrilotriacetic acid) sepharose  
233 column (GE Healthcare, USA) pre-equilibrated with the lysis buffer at a flow rate of 0.2  
234 ml/min. The protein was eluted in 50 mM Tris-HCl, 200 mM NaCl, 300 mM Imidazole,  
235 pH 8.0). The fractions containing the eluted protein were pooled and immediately  
236 subjected to buffer exchange using HiPrep<sup>TM</sup> 26/10 desalting column on an AKTA  
237 FPLC purification system (GE Healthcare, USA) into storage buffer (50 mM Tris-HCl,  
238 200 mM NaCl, pH 8.0). The protein was concentrated using Amicon Ultra-15 centrifugal  
239 filter units (Millipore, Germany) to around 8 mg/ml. Size-exclusion chromatography was  
240 performed at 4 °C using a HiLoad<sup>TM</sup> Superdex 200pg 16/600 GE preparative column  
241 (GE Healthcare, USA). The column was equilibrated with 50 mM Tris-HCl, 200 mM  
242 NaCl, pH 8.0. 250 µg protein was loaded into the column and eluted at a rate of 0.5  
243 ml/min. The chromatograms were calibrated with the absorption of the following  
244 proteins at 280nm: Ferritin (440kDa), Aldolase (158kDa), Conalbumin (75kDa),  
245 ovalbumin (44kDa) and Ribonuclease A (13.7kDa). Over-expression and purification of  
246 PTP-PEST was confirmed through SDS-PAGE. Protein concentration estimations were  
247 done through Bradford’s assay with bovine serum albumin serving as standard.

248 **Statistical analysis:** All experimental data are represented as mean  $\pm$  SEM for a  
249 minimum of three independent experiments. Statistical evaluation was performed using  
250 Student's *t*-test or one-way ANOVA, followed by Tukey's multiple comparison post hoc  
251 test, using GraphPad Prism version 6.0 software for Windows (GraphPad Prism  
252 Software Inc. San Diego, CA, USA). *p* value < 0.05 was considered to be statistically  
253 significant.

254

## 255 **Results:**

### 256 **Hypoxia enhances PTP-PEST protein levels and enzyme activity:**

257 To determine the effect of hypoxia (1% oxygen) on protein levels and enzyme activity of  
258 PTP-PEST in endothelial cells, HUVECs were cultured as monolayer and exposed to  
259 hypoxia for different time points. As can be seen in figure 1A and summarized in  
260 figure 1B, immunoblotting for PTP-PEST demonstrated a significant increase in protein  
261 levels from 3 hour onwards and it was sustained till 24 hours. Increase in protein levels  
262 of HIF-1 $\alpha$  confirmed induction of hypoxia in these cells. Further, to determine whether  
263 this effect of hypoxia on PTP-PEST expression is an endothelial specific phenomenon,  
264 or is it also observed in other cell types, we checked for changes in PTP-PEST  
265 expression in response to hypoxia in cell lines such as HEK293, HASMC (human aortic  
266 smooth muscle cell), HeLa (human cervical epitheloid carcinoma cell line) and Huh7  
267 (hepatocyte derived). As seen in figure 1C, hypoxia promotes PTP-PEST protein  
268 expression even in other cell lines, suggesting this to be a universal phenomenon.  
269 Equal loading and induction of hypoxia were confirmed for each of the cell lines via  
270 immunoblotting for  $\beta$ -actin and HIF-1 $\alpha$  respectively (data not shown). We also checked  
271 for changes in sub-cellular localization of PTP-PEST if any in response to hypoxia by

272 immunofluorescence imaging. Cytoplasmic localization of PTP-PEST was observed in  
273 normoxia which did not alter upon hypoxia treatment ([Supplementary figure 1](#)).

274 Since endothelial cells by virtue of their location are one of the early responders to  
275 changes in oxygen tension and are resilient to hypoxia to promote adaptive  
276 angiogenesis [19;20], we employed primary endothelial cells (HUVECs) as model cell  
277 system to determine the role of PTP-PEST in hypoxia mediated cellular responses. We  
278 set out to determine if hypoxia influences the catalytic activity of PTP-PEST. Equal  
279 amount of endogenous PTP-PEST was immuno-precipitated from endothelial lysate  
280 and was subjected to immuno-phosphatase assay. As seen in figure 1D, hypoxia  
281 induced a significant increase in phosphatase activity of PTP-PEST with the activity  
282 being maximal at 3 hours compared to normoxia treatment. Thus, hypoxia increases  
283 both protein levels and enzyme activity of PTP-PEST.

#### 284 **PTP-PEST interacts with AMPK $\alpha$ :**

285 To understand the functional relevance of hypoxia mediated enhanced expression and  
286 activity of PTP-PEST, it was necessary to recognise its binding partners. Most of the  
287 reported binding partners of PTP-PEST are involved in cell adhesion, migration, and  
288 cytoskeletal reorganization. We wanted to identify binding partner of PTP-PEST  
289 specifically in endothelial cells exposed to hypoxia and normoxia. For this, HUVECs  
290 were transduced with N-terminal GST tagged PTP-PEST lentiviral particles. Post-  
291 transduction same pool of cells was split and exposed to either normoxia or hypoxia for  
292 24 hours. Equal amount of GST tagged PTP-PEST was pulled down *via*  
293 immunoprecipitation using GST antibody and the co-immunoprecipitated proteins were  
294 subjected to LC/MS/MS analysis as described in methods section. The protein IDs  
295 obtained after mass spectrometry (MS) data were filtered for non-specific binding  
296 partners by removal of proteins appearing in MS of the isotype control sample. Further,

297 MS contaminants as per the common repository of adventitious proteins  
298 (<https://www.thegpm.org/crap/>) as well as proteins which are a part of the sepharose  
299 bead proteome were excluded from the analysis [21]. Proteins unique only to normoxia  
300 or hypoxia were subjected to analysis by gene ontology program PANTHER. The  
301 prominent binding partners observed solely in normoxia were signalling molecules,  
302 transcription factors and cytoskeletal proteins (figure 2A). Whereas, binding partners  
303 such as chaperones, hydrolases and oxidoreductases appeared exclusively in hypoxia  
304 (figure 2A). Some of specific binding partners observed in normoxia and hypoxia are  
305 listed in figure 2B. In hypoxia, we found proteins like OTUB1, PGK1 and PKC epsilon,  
306 which are known to play an important role in regulating autophagy interacting with PTP-  
307 PEST. Surprisingly, proteomic studies revealed AMPK $\alpha_1$  and  $\alpha_2$ , the catalytic subunits of  
308 5'-AMP-activated protein kinase (AMPK) as interacting partners of PTP-PEST in  
309 normoxia (figure 2B). Co-immunostaining of PTP-PEST and AMPK $\alpha$  followed by  
310 immunofluorescence imaging demonstrated that both PTP-PEST and AMPK $\alpha$  indeed  
311 co-localize in cytoplasm of HUVECs (figure 2C).

312 Intriguingly, our proteomics data revealed that interaction of PTP-PEST with AMPK $\alpha$   
313 was lost upon hypoxic treatment. In order to validate the interaction of PTP-PEST with  
314 AMPK $\alpha$  subunits, we performed co-immunoprecipitation experiments. Equal amounts of  
315 endogenous PTP-PEST were pulled down from normoxia and hypoxia exposed  
316 HUVECs and immunoblotting was performed for AMPK $\alpha$ . It is worth noting that the  
317 AMPK $\alpha$  antibody used for immunoblotting recognizes both the isoforms of  $\alpha$  subunit. In  
318 concurrence with the proteomics data, we found interaction of PTP-PEST with AMPK $\alpha$   
319 in normoxic condition, which was however abrogated in HUVECs exposed to hypoxia  
320 for 24 hours (figure 3A). Equal pull down of PTP-PEST across the two conditions was  
321 confirmed by re-probing the blot for PTP-PEST.

322 PTP-PEST consists of an N-terminal catalytic domain and a long C-terminal non  
323 catalytic domain, rich in PEST sequences. The C-terminal domain plays a significant  
324 role in regulating the enzyme activity of PTP-PEST by facilitating its interaction with  
325 either substrates and/or other adaptor proteins. Next, we checked whether the PEST  
326 domain is also essential for the interaction of PTP-PEST with AMPK $\alpha$ . We cloned the  
327 His tagged wild type (WT) and catalytic inactive (C231S) N-terminal catalytic domain (1-  
328 300 amino acids) lacking the C-terminal PEST sequences of human PTP-PEST into  
329 pET28a(+) bacterial expression vector. The two proteins were over expressed and  
330 purified from *E. coli* BL21 codon plus RIL (DE3) strain ([Supplementary figure 2A-C](#)).  
331 100 $\mu$ g of purified WT and C231S mutant proteins lacking the PEST motifs were  
332 independently incubated with 500  $\mu$ g of HUVEC lysate for 8 hours at 4°C. This was  
333 followed by immunoprecipitation of PTP-PEST using a His-tag antibody and  
334 immunoblotting for AMPK $\alpha$ . Equal pull down of PTP-PEST was confirmed by re-probing  
335 the blot for PTP-PEST. We found co-immunoprecipitation of AMPK $\alpha$  with N-terminal  
336 catalytic domain of PTP-PEST (figure 3B), which suggests that the interaction of  
337 AMPK $\alpha$  with PTP-PEST is not dependent on the C-terminal PEST domain. Moreover,  
338 co-immunoprecipitation of AMPK $\alpha$  with the C231S (catalytically inactive) mutant was  
339 greater in comparison to WT (figure 3B), suggesting that AMPK $\alpha$  is a likely substrate of  
340 PTP-PEST.

#### 341 **PTP-PEST mediates hypoxia-induced AMPK activation:**

342 AMPK is a hetero-trimeric stress responsive serine-threonine kinase known to play an  
343 important role in maintaining cellular energy homeostasis as well as autophagy [22].  
344 Next, we wanted to understand the relevance of interaction of AMPK $\alpha$  subunits with  
345 PTP-PEST, a tyrosine phosphatase. Since, PTP-PEST interacts with AMPK $\alpha$  *via* its  
346 catalytic domain; we were interested in examining whether PTP-PEST can

347 dephosphorylate AMPK $\alpha$ . First, we determined the effect of hypoxia on total tyrosine  
348 phosphorylation of AMPK $\alpha$ . We initially tried immunoprecipitating endogenous AMPK $\alpha$   
349 but faced some difficulties. Hence, we resorted to an alternative approach that was  
350 employed by Yamada et al [23]. For this, HUVECs were exposed to hypoxia for  
351 different time periods. Equal amount of HUVEC lysate following experimental treatment  
352 was subjected to immunoprecipitation with Phospho-Tyr-102 antibody, followed by  
353 immunoblotting for AMPK $\alpha$ . Tyrosine phosphorylation of AMPK $\alpha$  in HUVECs exposed  
354 to hypoxia for 24 hours was lower in comparison to that exposed to normoxia (figure  
355 3C), indicating its dephosphorylation. It is worth noting that the total AMPK $\alpha$  levels in  
356 endothelial cells did not change across treatment conditions (figure 3C). Next, we  
357 knocked down PTP-PEST using shRNA lentivirus to check its effect on AMPK $\alpha$  tyrosine  
358 dephosphorylation in response to hypoxia (24 hr). Scrambled shRNA lentivirus was  
359 used as negative control. We found that hypoxia induced AMPK $\alpha$  dephosphorylation  
360 was indeed abrogated upon PTP-PEST knock down (figure 3D and E). In fact, in the  
361 absence of PTP-PEST, the basal tyrosine phosphorylation of AMPK $\alpha$  itself was  
362 increased, while the total protein levels of AMPK $\alpha$  remained unchanged upon PTP-  
363 PEST knock down. Thus, PTP-PEST does regulate tyrosine dephosphorylation of  
364 AMPK $\alpha$  in response to hypoxia without influencing its protein levels.

365 AMPK can be regulated both allosterically and by means of post-translational  
366 modifications. Phosphorylation at Thr<sup>172</sup> residing in the kinase domain of  $\alpha$ -subunit is an  
367 efficient mechanism of AMPK activation [22]. Therefore, next, the effect of hypoxia on  
368 AMPK activation in endothelial cells was examined. HUVECs were exposed to hypoxia  
369 for different time points and immunoblotting was performed for phosphorylation of  
370 Thr<sup>172</sup>. Thr<sup>172</sup> phosphorylation was seen in response to hypoxia as early as 15 minutes  
371 and it was sustained up to 24 hours (figure 3F and [supplementary figure 2D](#)). Since we

372 observed that PTP-PEST mediates hypoxia induced tyrosine dephosphorylation of  
373 AMPK, we set out to determine if absence of PTP-PEST also influences Thr<sup>172</sup>  
374 phosphorylation of AMPK. For this purpose HUVECs were transduced with PTP-PEST  
375 shRNA and scrambled shRNA lentivirus followed by hypoxia treatment and  
376 immunoblotting for phospho Thr<sup>172</sup> AMPK $\alpha$ . Interestingly, we found hypoxia induced  
377 AMPK activation was attenuated in HUVECs upon PTP-PEST knock down (figure 3G).  
378 Simultaneously, we also checked for phosphorylation of ACC at Ser<sup>79</sup> (a known  
379 substrate of AMPK) as a read out of AMPK activity. We found that hypoxia-induced  
380 phosphorylation of ACC at Ser<sup>79</sup> was also attenuated in PTP-PEST knock down cells  
381 (figure 3G). These observations, in conjunction with loss of interaction between PTP-  
382 PEST and AMPK $\alpha$  under hypoxia, demonstrate that AMPK $\alpha$  is a substrate of PTP-  
383 PEST, wherein PTP-PEST mediates tyrosine dephosphorylation of AMPK $\alpha$  and  
384 regulates its catalytic activity.

#### 385 **PTP-PEST regulates hypoxia-induced autophagy via AMPK:**

386 AMPK is known to regulate autophagy *via* dual mechanism, involving inactivation of  
387 mTORC1 and direct phosphorylation of ULK1 at Ser<sup>317</sup> [24;25]. Since, we observed that  
388 PTP-PEST dependent tyrosine dephosphorylation of AMPK $\alpha$  is associated with its  
389 activation in response to hypoxia; we next wanted to understand the role of PTP-PEST  
390 in hypoxia-induced endothelial cell autophagy. For this we first tested the effect of  
391 hypoxia on endothelial autophagy followed by knock down experiments. HUVECs  
392 exposed to hypoxia for different time intervals displayed an increase in LC3 degradation  
393 (LC3II form) following hypoxia ([supplementary figure 3A&B](#)). An increase in LC3II form  
394 indicates induction of autophagy since it plays an indispensable role in autophagosome  
395 biogenesis. Along with an increase in LC3II levels, other autophagic markers like  
396 beclin-1 and phosphorylation of Ser<sup>317</sup> ULK1 were also enhanced in response to



397 hypoxia ([supplementary figure 3A, C and D](#)). In addition, a decrease in Ser<sup>757</sup> ULK1  
398 phosphorylation, another indicator of autophagy, was also observed ([Supplementary](#)  
399 [figure 3A and E](#)). It should be noted that Ser<sup>757</sup> dephosphorylation of ULK1 reflects  
400 inactivation of mTORC1. We also examined LC3 puncta formation in response to  
401 hypoxia by LC3 immunostaining, followed by confocal imaging. As seen in  
402 [supplementary figure 3F](#), high accumulation of LC3 puncta representing  
403 autophagosomes was observed in HUVECs treated with hypoxia. This led to a  
404 significant increase in the number of puncta per cell as well as percent of LC3 positive  
405 cells ([supplementary figure 3G and H](#)). Treatment with bafilomycin A1 (100nM) further  
406 increased the number of LC3 puncta per cell, indicating that autophagy was in progress  
407 during hypoxia. Bafilomycin A1 treatment was given for the last 6 hours of hypoxia  
408 treatment.

409 Next, we wanted to determine whether hypoxia-induced autophagy was dependent on  
410 PTP-PEST mediated AMPK activation. As seen in figure 4 A and B, increase in hypoxia  
411 induced LC3 degradation was significantly attenuated upon knock down of PTP-PEST.  
412 Further, we performed LC3 immunostaining in scrambled and PTP-PEST shRNA  
413 treated cells in absence and presence of AMPK activator metformin (500  $\mu$ M).  
414 Metformin treatment was given for 24 hours along with hypoxia. As can be seen from  
415 figure 4 C-E, hypoxia-induced increase in number of LC3 puncta per cell as well as  
416 percent of cells with puncta-like structures were significantly attenuated upon PTP-  
417 PEST knock-down. This attenuation in autophagy due to absence of PTP-PEST was  
418 however recovered upon metformin treatment concluding that PTP-PEST is necessary  
419 for hypoxia-induced autophagy *via* AMPK activation (figure 4 C-E).

420 **PTP-PEST regulates hypoxia-induced angiogenesis via autophagy:**

421 Hypoxia the principle physiological stimulus for angiogenesis, regulates multiple steps  
422 of sprouting angiogenesis including endothelial cell migration, tube formation and  
423 vessel branching [26-28]. Additionally, induction of autophagy in response to hypoxia is  
424 both a protective survival mechanism as well as an inducer of angiogenesis in  
425 endothelial cells [29;30]. We thus examined the effect of PTP-PEST knock-down on  
426 hypoxia-induced angiogenic responses such as migration and capillary tube formation.  
427 As seen in figure 5A and B, both basal and hypoxia induced endothelial cell migration  
428 was attenuated in PTP-PEST knockdown cells, in wound healing experiments.  
429 Scrambled shRNA lentivirus was used as a mock transduction. The knockdown of  
430 endogenous PTP-PEST was confirmed through Western blotting (figure 5C).

431 Further, to examine the role of PTP-PEST in hypoxia-induced tube formation *in vitro*,  
432 HUVECs were placed on growth factor free Matrigel after transduction with scrambled  
433 shRNA or PTP-PEST shRNA lentivirus, and tube formation was assessed under  
434 normoxic and hypoxic conditions. Tubular network was quantified after 16 hours of  
435 incubation *via* Image J software. We observed an increase in the number of segments,  
436 number of junctions as well as in total length of tubes in response to hypoxia (figure 6).  
437 Among these effects of hypoxia, PTP-PEST knock-down significantly attenuated  
438 number of segments and junctions. PTP-PEST knock down was confirmed through  
439 immunoblotting (figure 6E). Interestingly use of rapamycin (200nM), an mTOR inhibitor  
440 and autophagy inducer, reversed the effect of loss of PTP-PEST by increasing the  
441 number of junctions and segments of tubes for PTP-PEST knockdown cells (figure. 6 A-  
442 D). Together, these observations indicate that PTP-PEST promotes hypoxia-induced  
443 angiogenesis through AMPK dependent autophagy pathway.

444

445 **Discussion:**

446 The results of the present study demonstrate that hypoxia increases the expression and  
447 catalytic activity of cytosolic tyrosine phosphatase PTP-PEST to promote endothelial  
448 autophagy and consequent angiogenesis. These functional effects of hypoxia are  
449 dependent on PTP-PEST mediated tyrosine dephosphorylation and activation of 5'-  
450 adenosine monophosphate (AMP)-activated protein kinase (AMPK).

451 As the name suggests, AMPK is a physiological energy sensor that is activated in  
452 response to increased intracellular concentrations of AMP under stress conditions of  
453 hypoxia, calorie restriction, or exercise. Upon activation, it inhibits energy utilizing  
454 anabolic processes and instead, promotes catabolic processes such as fatty acid  
455 oxidation, glycolysis and autophagy [22;31]. AMPK holoenzyme is a heterotrimeric  
456 complex composed of a catalytic  $\alpha$  subunit in complex with two regulatory subunits,  $\beta$   
457 and  $\gamma$  [32]. The kinase domain (KD) of  $\alpha$  subunit harbors Thr<sup>172</sup> residue in the catalytic  
458 cleft formed by its N- and C- terminal lobes (figure 7) [33;34]. In an inactive state, the  
459 back end of these lobes opposite to the catalytic cleft are held by the evolutionarily  
460 conserved Auto-Inhibitory Domain (AID). The AID in turn is connected to a flexible  
461 regulatory motif termed as the  $\alpha$ -regulatory subunit interacting motif ( $\alpha$ -RIM). Multiple  
462 crystallography studies have demonstrated that binding of AMP molecules to the  $\gamma$   
463 subunit transmits a conformational change to the  $\alpha$ -RIM, allowing it to pull the AID away  
464 from the kinase domain to relieve inhibition (figure 7) [35;36]. As a consequence of this  
465 long range allosteric regulation, Thr<sup>172</sup> at the catalytic site is now accessible for  
466 phosphorylation by LKB1 or CAMKK $\beta$  to enhance its enzyme activity several 100-fold  
467 [33;37]. Two isoforms of  $\alpha$  subunit ( $\alpha_1$  and  $\alpha_2$ ) exhibiting considerable sequence identity  
468 and conformational similarity have been reported [38]. It is worth noting that both these  
469 isoforms of  $\alpha$  subunit interacted with PTP-PEST under normoxic condition, with the  
470 interaction being lost in hypoxia. Interestingly both these isoforms of  $\alpha$  subunit are

471 expressed in endothelial cells, where they participate in hypoxia-induced  
472 angiogenesis[39;40].

473 In the current study it was found that hypoxia-induced activation of AMPK was  
474 dependent on PTP-PEST. The catalytic domain of PTP-PEST (1-300 aa) was sufficient  
475 for interaction with AMPK $\alpha$ , thereby suggesting that AMPK $\alpha$  subunits are PTP-PEST  
476 substrates. The endogenous interaction between AMPK $\alpha$  and PTP-PEST was lost in  
477 hypoxia. This loss of interaction coincided with tyrosine dephosphorylation of AMPK $\alpha$ .  
478 Interestingly, knock-down of PTP-PEST not only enhanced the basal tyrosine  
479 phosphorylation of AMPK, but also prevented hypoxia mediated activation of AMPK, as  
480 assessed through Thr<sup>172</sup> phosphorylation. To the best of our knowledge, this is the first  
481 study to directly demonstrate regulation of AMPK activity by a cytosolic tyrosine  
482 phosphatase. Although not much is known about the regulation of AMPK by tyrosine  
483 phosphorylation, a recent study demonstrated that phosphorylation of Tyr<sup>436</sup> in the  $\alpha$ -  
484 subunit (figure 7) reduces its catalytic activity by modulating AID- $\alpha$ RIM interaction [23].  
485 It is thus tempting to speculate that PTP-PEST may dephosphorylate this residue of the  
486  $\alpha$ -subunit under hypoxic condition to activate AMPK. This possibility however needs to  
487 be studied.

488 One of the major consequences of AMPK activation in endothelial cells is induction of  
489 autophagy to promote survival and angiogenesis [19;22;31;41]. This adaptive response  
490 imparts resilience to endothelial cells towards stress conditions such as heat shock,  
491 hypoxia, shear stress and calorie restriction [42-44]. In fact defective endothelial  
492 autophagy is associated with vascular aging, thrombosis, atherosclerosis and even  
493 arterial stiffness [42;45]. AMPK activates autophagy either by phosphorylating ULK1 at  
494 Ser<sup>317</sup> or by inhibiting mTORC1 [24;25]. Both these events lead to autophagosome  
495 formation. To couple the changes in PTP-PEST and AMPK activity with endothelial cell

496 function, we assessed the consequence of PTP-PEST knock-down on hypoxia-induced  
497 autophagy. We found that despite induction of hypoxia, autophagy was attenuated in  
498 the absence of PTP-PEST. This effect was however rescued by AMPK activator  
499 metformin demonstrating that AMPK activation lies downstream of PTP-PEST in the  
500 signalling cascade. Apart from activating AMPK, it was interesting to note that PTP-  
501 PEST also interacted with other proteins such as ubiquitin thioesterase (OTUB1),  
502 protein kinase C- $\xi$  (PKC- $\xi$ ), myotubularin related protein 6 (MTMR6) and sarcolemmal  
503 membrane associated protein (SLAMP), all of which are either directly involved in  
504 autophagy or its regulation [46-48]. Thus, the current findings also identify hitherto  
505 unreported role of PTP-PEST in regulating endothelial autophagy.

506 PTP-PEST is an efficient enzyme with a  $K_{cat}/K_m \geq 7 \times 10^6 \text{ M}^{-1}\text{s}^{-1}$  [49;50]. A key finding of  
507 the current study is that hypoxia increases both expression and activity of PTP-PEST. It  
508 is presently unclear how hypoxia brings about these effects, but a preliminary  
509 CONSITE based *in silico* analysis of the putative promoter region of PTP-PEST  
510 indicates presence of multiple HIF-1 $\alpha$  binding sites (not shown), suggesting a possible  
511 increase in PTP-PEST transcription in response to hypoxia. Alternatively, hypoxia may  
512 enhance the protein stability of PTP-PEST. A great deal is known about the ability of  
513 the 'PEST' sequences to regulate protein stability since they are capable of roping in  
514 ubiquitin ligases [51]. Post-translational modifications of proline rich 'PEST' sequences  
515 such as phosphorylation or prolyl hydroxylation assist in these interactions [52;53]. HIF-  
516 Prolyl Hydroxylases (PHDs) in presence of oxygen, hydroxylate proline residues to  
517 recruit von-Hippel Lindau (vHL) ubiquitin ligases [54]. However, under hypoxic condition  
518 they fail to hydroxylate prolines and thus fail to induce protein degradation. In fact this  
519 mode of regulation is also responsible for increasing the stability of HIF-1 $\alpha$  under  
520 hypoxia. The fact that we observed an increased interaction of deubiquitinase OTUB1

521 with PTP-PEST during hypoxia also supports the notion that hypoxia may increase the  
522 stability of PTP-PEST protein.

523 Increased activity of PTP-PEST could occur as a result of several events, including,  
524 changes in sub-cellular localization, protein-protein interactions or even post-  
525 translational modifications in response to hypoxia. We did not observe any change in  
526 sub-cellular localization of PTP-PEST in response to hypoxia (supplementary figure 1).  
527 However, it is possible that PTP-PEST may undergo serine, threonine or tyrosine  
528 phosphorylation upon induction of hypoxia. Indeed phosphorylation of Ser<sup>39</sup> is known to  
529 reduce the substrate specificity and activity of PTP-PEST [8]. Likewise, Tyr<sup>64</sup>, an  
530 evolutionarily conserved residue in the 'P-Tyr-loop' of PTP-PEST is reported to be  
531 essential for its catalytic activity [49]. In contrast, Ser<sup>571</sup> phosphorylation enhances its  
532 substrate binding [16]. Whether hypoxia induces serine, threonine or tyrosine  
533 phosphorylation of PTP-PEST to modulate either its stability and/or activity is the  
534 subject of ongoing investigation in our laboratory.

535 By virtue of its ability to regulate important cellular processes such as cell adhesion and  
536 migration of numerous cell types including embryonic fibroblasts, endothelial cells,  
537 dendritic cells, T cells or macrophages, PTP-PEST plays an essential role in  
538 cardiovascular development, tissue differentiation and immune function [8;9;13]. Yet the  
539 role of PTP-PEST in cancer is controversial with some regarding it as a tumor  
540 suppressor while others associate it with metastasis and tumor vasculature [8;15;16].  
541 Our observations of PTP-PEST regulating hypoxia-induced autophagy in native  
542 endothelial cells identifies a new functional role of this phosphatase in endothelial  
543 physiology. Whether this role of endothelial PTP-PEST is of consequence in tumor  
544 angiogenesis under transformed settings needs to be elucidated in future studies. In  
545 conclusion, data presented here demonstrates that hypoxia increases expression and

546 activity of cytosolic PTP-PEST, which in turn activates AMPK to promote endothelial  
547 autophagy and angiogenesis.

548 **Figure Legends:**

549 **Figure 1. Hypoxia-induced PTP-PEST protein level and enzyme activity.** (A)

550 Representative western blot demonstrating effect of hypoxia on protein expression of  
551 PTP-PEST and HIF-1 $\alpha$  in HUVECs. (B) Bar graph summarizing data for PTP-PEST  
552 protein expression for 10 independent experiments. (C) Representative Western blot  
553 depicting effect of hypoxia on protein expression of PTP-PEST in HeLa, HASMC  
554 HEK293 and Huh7 cell lines. (D) Bar graph summarizing data for PTP-PEST  
555 immunophosphatase assay in response to hypoxia (n=3). Inset: representative Western  
556 blot panel confirming equal pulldown of immunoprecipitated PTP-PEST. Bar graph  
557 represents data as mean  $\pm$  SEM. (\*p<0.05, \*\*p<0.01 and \*\*\*p<0.001 versus normoxia).

558 **Figure 2. Proteomics analysis of protein IDs obtained from LC/MS-MS data.** (A)

559 Pie chart representing classes of interacting protein partners of PTP-PEST in normoxia  
560 and hypoxia. (B) List of proteins interacting with PTP-PEST exclusively either in  
561 normoxia or in hypoxia. Uniport IDs of binding proteins is listed in parentheses. (C)  
562 Representative Immunofluorescence image demonstrating co-localization of PTP-PEST  
563 and AMPK $\alpha$  in primary endothelial cells.

564 **Figure 3. AMPK $\alpha$  is an interacting partner and substrate for PTP-PEST.** (A)

565 Representative Western blot and bar graph depicting co-immunoprecipitation of AMPK $\alpha$   
566 with PTP-PEST from HUVECs exposed to hypoxia and normoxia. (B) Representative  
567 Western blot and bar graph showing co-immunoprecipitation of AMPK $\alpha$  with purified  
568 His-PTP-PEST WT (1-300 amino acids) and His-PTP-PEST C231S mutant (1-300  
569 amino acids). (C) Representative Western blot and bar graph demonstrating effect of

570 hypoxia on AMPK $\alpha$  tyrosine dephosphorylation. (D) Representative Western blot  
571 demonstrating effect of PTP-PEST knockdown on hypoxia-induced AMPK $\alpha$   
572 dephosphorylation. (E) Bar graph summarizing effect of PTP-PEST knock-down on  
573 AMPK dephosphorylation. (F) Representative Western blot depicting effect of hypoxia  
574 on AMPK $\alpha$  activation (Thr<sup>172</sup>phosphorylation). (G) Effect of PTP-PEST knockdown on  
575 hypoxia-induced AMPK $\alpha$  Thr<sup>172</sup> phosphorylation and ACC Ser<sup>79</sup> phosphorylation. In bar  
576 graph data is represented as mean  $\pm$  SEM. (\*p<0.05, \*\*p<0.01 and \*\*\*p<0.001 versus  
577 corresponding normoxia).

578 **Figure 4. Hypoxia-induced autophagy is dependent on PTP-PEST.** (A)  
579 Representative Western blot depicting effect of PTP-PEST knockdown on hypoxia  
580 induced LC3 degradation. (B) Bar graph summarizing data of LC3 Western blotting for  
581 5 independent experiments. (C) Representative images showing effect of PTP-PEST  
582 knockdown on LC3 puncta formation. (D) Bar graph summarizing data for number of  
583 puncta per cell. (E) Bar graph summarizing data for percent of cells with puncta like  
584 structures for three independent experiments. In bar graphs data is represented as  
585 mean  $\pm$  S.E.M (\*p<0.05, \*\*p<0.01, \*\*\*p<0.001 vs corresponding comparisons).

586 **Figure 5. Hypoxia-induced endothelial cell migration is PTP-PEST dependent.** (A)  
587 Representative images of scratch wound assay demonstrating wound closure by  
588 migrating endothelial cells. (B) Bar graph summarizing data as mean  $\pm$  S.E.M for four  
589 independent experiments. (C) Representative Western blot confirming knockdown of  
590 PTP-PEST. (\*\*p<0.01 and \*\*\*p<0.001 vs corresponding normoxia treatment).

591 **Figure 6. Hypoxia-induced tube formation is PTP-PEST dependent.** (A)  
592 Representative images for tube formation assay. (B-D) Bar graphs summarizing data  
593 for number of segments/tubes, number of junctions and length of tubes. (E)  
594 Representative Western blot confirming PTP-PEST knockdown in HUVECs. In bar



595 graphs data is represented as mean  $\pm$  S.E.M for four independent experiments.  
596 (\* $p < 0.05$  and \*\* $p < 0.01$  vs corresponding normoxia).

597

### 598 **Acknowledgement:**

599 Authors would like to thank Dr. S. Umadevi, Scientist at Translational Research  
600 Platform for Veterinary Biologicals, Tamil Nadu Veterinary and Animal Sciences  
601 University, Chennai for her technical assistance with confocal microscopy.

602

### 603 **Author Contribution:**

604 Shivam Chanel conceived the idea, performed all cell culture experiments, Western  
605 blotting, Immunoprecipitation and Immunophosphatase assays, and analysed the  
606 relevant data. Amrutha Manikandan analysed the proteomics data. Nikunj Mehta over-  
607 expressed and purified WT-PEST and C231S-PEST proteins from *E.coli*. Abel Arul  
608 Nathan performed confocal microscopy. Rakesh Kumar Tiwari isolated and cultured  
609 endothelial cells. Samar Bhallabha Mohapatra assisted in protein expression and  
610 purification experiments. Mahesh Chandran executed in-gel digestion and LC/MS/MS  
611 based proteomics. Abdul Jaleel planned and supervised proteomics and performed  
612 LC/MS/MS data analysis. Narayanan Manoj supervised biochemical studies with  
613 purified proteins and provided intellectual inputs. Madhulika Dixit, procured funding,  
614 planned and supervised the cell culture experiments, provided intellectual inputs and  
615 wrote the manuscript.

616

### 617 **Funding Information:**

618 This work was supported through Department of Biotechnology (DBT)[File#  
619 BT/PR12547/MED/30/1456/2014]and Science and Engineering Research Board  
620 (SERB) [File# EMR/2015/000704], Government of India sponsored research funding.

621

## 622 **Conflict of Interest:**

623 Authors have no conflict of interests to declare.

624

## 625 **References**

626

627 [1] S. L. Dunwoodie, "The role of hypoxia in development of the Mammalian  
628 embryo," *Dev. Cell*, vol. 17, no. 6, pp. 755-773, Dec.2009.

629 [2] M. C. Simon and B. Keith, "The role of oxygen availability in embryonic  
630 development and stem cell function," *Nat. Rev. Mol. Cell Biol.*, vol. 9, no. 4, pp.  
631 285-296, Apr.2008.

632 [3] M. Sugano, K. Tsuchida, and N. Makino, "A protein tyrosine phosphatase  
633 inhibitor accelerates angiogenesis in a rat model of hindlimb ischemia," *J.*  
634 *Cardiovasc. Pharmacol.*, vol. 44, no. 4, pp. 460-465, Oct.2004.

635 [4] C. F. Yang, Y. Y. Chen, J. P. Singh, S. F. Hsu, Y. W. Liu, C. Y. Yang, C. W.  
636 Chang, S. N. Chen, R. H. Shih, S. D. Hsu, Y. S. Jou, C. F. Cheng, and T. C.  
637 Meng, "Targeting protein tyrosine phosphatase PTP-PEST (PTPN12) for  
638 therapeutic intervention in acute myocardial infarction," *Cardiovasc. Res.*, vol.  
639 116, no. 5, pp. 1032-1046, Apr.2020.

640 [5] Q. M. Ashraf, S. H. Haider, C. D. Katsetos, M. Delivoria-Papadopoulos, and O.  
641 Mishra, "Nitric oxide-mediated alterations of protein tyrosine phosphatase activity  
642 and expression during hypoxia in the cerebral cortex of newborn piglets,"  
643 *Neurosci. Lett.*, vol. 362, no. 2, pp. 108-112, May2004.

644 [6] R. Montesano, M. S. Pepper, D. Belin, J. D. Vassalli, and L. Orci, "Induction of  
645 angiogenesis in vitro by vanadate, an inhibitor of phosphotyrosine  
646 phosphatases," *J. Cell Physiol*, vol. 134, no. 3, pp. 460-466, Mar.1988.

647 [7] A. J. Barr, E. Ugochukwu, W. H. Lee, O. N. King, P. Filippakopoulos, I. Alfano, P.  
648 Savitsky, N. A. Burgess-Brown, S. Muller, and S. Knapp, "Large-scale structural  
649 analysis of the classical human protein tyrosine phosphatome," *Cell*, vol. 136,  
650 no. 2, pp. 352-363, Jan.2009.

651 [8] C. Lee and I. Rhee, "Important roles of protein tyrosine phosphatase PTPN12 in  
652 tumor progression," *Pharmacol. Res.*, vol. 144, pp. 73-78, June2019.

- 653 [9] A. Veillette, I. Rhee, C. M. Souza, and D. Davidson, "PEST family phosphatases  
654 in immunity, autoimmunity, and autoinflammatory disorders," *Immunol. Rev.*, vol.  
655 228, no. 1, pp. 312-324, Mar.2009.
- 656 [10] D. Davidson and A. Veillette, "PTP-PEST, a scaffold protein tyrosine  
657 phosphatase, negatively regulates lymphocyte activation by targeting a unique  
658 set of substrates," *EMBO J.*, vol. 20, no. 13, pp. 3414-3426, July2001.
- 659 [11] H. Dong, F. Zonta, S. Wang, K. Song, X. He, M. He, Y. Nie, and S. Li, "Structure  
660 and Molecular Dynamics Simulations of Protein Tyrosine Phosphatase Non-  
661 Receptor 12 Provide Insights into the Catalytic Mechanism of the Enzyme," *Int.*  
662 *J. Mol. Sci.*, vol. 19, no. 1 Dec.2017.
- 663 [12] J. Sirois, J. F. Cote, A. Charest, N. Uetani, A. Bourdeau, S. A. Duncan, E.  
664 Daniels, and M. L. Tremblay, "Essential function of PTP-PEST during mouse  
665 embryonic vascularization, mesenchyme formation, neurogenesis and early liver  
666 development," *Mech. Dev.*, vol. 123, no. 12, pp. 869-880, Dec.2006.
- 667 [13] C. M. Souza, D. Davidson, I. Rhee, J. P. Gratton, E. C. Davis, and A. Veillette,  
668 "The phosphatase PTP-PEST/PTPN12 regulates endothelial cell migration and  
669 adhesion, but not permeability, and controls vascular development and  
670 embryonic viability," *J. Biol. Chem.*, vol. 287, no. 51, pp. 43180-43190,  
671 Dec.2012.
- 672 [14] E. A. Duffy, P. R. Pretorius, S. Lerach, J. L. Lohr, B. Hirsch, C. M. Souza, A.  
673 Veillette, and L. A. Schimmenti, "Mosaic partial deletion of PTPN12 in a child  
674 with interrupted aortic arch type A," *Am. J. Med. Genet. A*, vol. 167A, no. 11, pp.  
675 2674-2683, Nov.2015.
- 676 [15] Z. Chen, J. E. Morales, P. A. Guerrero, H. Sun, and J. H. McCarty,  
677 "PTPN12/PTP-PEST Regulates Phosphorylation-Dependent Ubiquitination and  
678 Stability of Focal Adhesion Substrates in Invasive Glioblastoma Cells," *Cancer*  
679 *Res.*, vol. 78, no. 14, pp. 3809-3822, July2018.
- 680 [16] Y. Zheng, W. Yang, Y. Xia, D. Hawke, D. X. Liu, and Z. Lu, "Ras-induced and  
681 extracellular signal-regulated kinase 1 and 2 phosphorylation-dependent  
682 isomerization of protein tyrosine phosphatase (PTP)-PEST by PIN1 promotes  
683 FAK dephosphorylation by PTP-PEST," *Mol. Cell Biol.*, vol. 31, no. 21, pp. 4258-  
684 4269, Nov.2011.
- 685 [17] E. Campeau, V. E. Ruhl, F. Rodier, C. L. Smith, B. L. Rahmberg, J. O. Fuss, J.  
686 Campisi, P. Yaswen, P. K. Cooper, and P. D. Kaufman, "A versatile viral system  
687 for expression and depletion of proteins in mammalian cells," *PLoS. One.*, vol. 4,  
688 no. 8, p. e6529, Aug.2009.
- 689 [18] A. Shevchenko, H. Tomas, J. Havlis, J. V. Olsen, and M. Mann, "In-gel digestion  
690 for mass spectrometric characterization of proteins and proteomes," *Nat. Protoc.*,  
691 vol. 1, no. 6, pp. 2856-2860, 2006.
- 692 [19] I. Filippi, I. Saltarella, C. Aldinucci, F. Carraro, R. Ria, A. Vacca, and A. Naldini,  
693 "Different Adaptive Responses to Hypoxia in Normal and Multiple Myeloma  
694 Endothelial Cells," *Cell Physiol Biochem.*, vol. 46, no. 1, pp. 203-212, 2018.

- 695 [20] A. Koziel and W. Jarmuszkiewicz, "Hypoxia and aerobic metabolism adaptations  
696 of human endothelial cells," *Pflugers Arch.*, vol. 469, no. 5-6, pp. 815-827,  
697 June2017.
- 698 [21] L. Trinkle-Mulcahy, S. Boulon, Y. W. Lam, R. Urcia, F. M. Boisvert, F.  
699 Vandermoere, N. A. Morrice, S. Swift, U. Rothbauer, H. Leonhardt, and A.  
700 Lamond, "Identifying specific protein interaction partners using quantitative mass  
701 spectrometry and bead proteomes," *J. Cell Biol.*, vol. 183, no. 2, pp. 223-239,  
702 Oct.2008.
- 703 [22] S. M. Jeon, "Regulation and function of AMPK in physiology and diseases," *Exp.*  
704 *Mol. Med.*, vol. 48, no. 7, p. e245, July2016.
- 705 [23] E. Yamada, S. Okada, C. C. Bastie, M. Vatish, Y. Nakajima, R. Shibusawa, A.  
706 Ozawa, J. E. Pessin, and M. Yamada, "Fyn phosphorylates AMPK to inhibit  
707 AMPK activity and AMP-dependent activation of autophagy," *Oncotarget.*, vol. 7,  
708 no. 46, pp. 74612-74629, Nov.2016.
- 709 [24] J. Kim, M. Kundu, B. Viollet, and K. L. Guan, "AMPK and mTOR regulate  
710 autophagy through direct phosphorylation of Ulk1," *Nat. Cell Biol.*, vol. 13, no. 2,  
711 pp. 132-141, Feb.2011.
- 712 [25] S. Alers, A. S. Loffler, S. Wesselborg, and B. Stork, "Role of AMPK-mTOR-  
713 Ulk1/2 in the regulation of autophagy: cross talk, shortcuts, and feedbacks," *Mol.*  
714 *Cell Biol.*, vol. 32, no. 1, pp. 2-11, Jan.2012.
- 715 [26] B. L. Krock, N. Skuli, and M. C. Simon, "Hypoxia-induced angiogenesis: good  
716 and evil," *Genes Cancer*, vol. 2, no. 12, pp. 1117-1133, Dec.2011.
- 717 [27] J. A. Forsythe, B. H. Jiang, N. V. Iyer, F. Agani, S. W. Leung, R. D. Koos, and G.  
718 L. Semenza, "Activation of vascular endothelial growth factor gene transcription  
719 by hypoxia-inducible factor 1," *Mol. Cell Biol.*, vol. 16, no. 9, pp. 4604-4613,  
720 Sept.1996.
- 721 [28] E. B. Rankin, J. Rha, T. L. Unger, C. H. Wu, H. P. Shutt, R. S. Johnson, M. C.  
722 Simon, B. Keith, and V. H. Haase, "Hypoxia-inducible factor-2 regulates vascular  
723 tumorigenesis in mice," *Oncogene*, vol. 27, no. 40, pp. 5354-5358, Sept.2008.
- 724 [29] P. Liang, B. Jiang, Y. Li, Z. Liu, P. Zhang, M. Zhang, X. Huang, and X. Xiao,  
725 "Autophagy promotes angiogenesis via AMPK/Akt/mTOR signaling during the  
726 recovery of heat-denatured endothelial cells," *Cell Death. Dis.*, vol. 9, no. 12, p.  
727 1152, Nov.2018.
- 728 [30] J. Du, R. J. Teng, T. Guan, A. Eis, S. Kaul, G. G. Konduri, and Y. Shi, "Role of  
729 autophagy in angiogenesis in aortic endothelial cells," *Am. J. Physiol Cell*  
730 *Physiol*, vol. 302, no. 2, p. C383-C391, Jan.2012.
- 731 [31] Y. C. Long and J. R. Zierath, "AMP-activated protein kinase signaling in  
732 metabolic regulation," *J. Clin. Invest*, vol. 116, no. 7, pp. 1776-1783, July2006.
- 733 [32] F. A. Ross, C. MacKintosh, and D. G. Hardie, "AMP-activated protein kinase: a  
734 cellular energy sensor that comes in 12 flavours," *FEBS J.*, vol. 283, no. 16, pp.  
735 2987-3001, Aug.2016.

- 736 [33] A. Woods, S. R. Johnstone, K. Dickerson, F. C. Leiper, L. G. Fryer, D. Neumann,  
737 U. Schlattner, T. Wallimann, M. Carlson, and D. Carling, "LKB1 is the upstream  
738 kinase in the AMP-activated protein kinase cascade," *Curr. Biol.*, vol. 13, no. 22,  
739 pp. 2004-2008, Nov.2003.
- 740 [34] S. C. Stein, A. Woods, N. A. Jones, M. D. Davison, and D. Carling, "The  
741 regulation of AMP-activated protein kinase by phosphorylation," *Biochem. J.*, vol.  
742 345 Pt 3, pp. 437-443, Feb.2000.
- 743 [35] L. Chen, Z. H. Jiao, L. S. Zheng, Y. Y. Zhang, S. T. Xie, Z. X. Wang, and J. W.  
744 Wu, "Structural insight into the autoinhibition mechanism of AMP-activated  
745 protein kinase," *Nature*, vol. 459, no. 7250, pp. 1146-1149, June2009.
- 746 [36] J. Li, S. Li, F. Wang, and F. Xin, "Structural and biochemical insights into the  
747 allosteric activation mechanism of AMP-activated protein kinase," *Chem. Biol.*  
748 *Drug Des*, vol. 89, no. 5, pp. 663-669, May2017.
- 749 [37] S. A. Hawley, D. A. Pan, K. J. Mustard, L. Ross, J. Bain, A. M. Edelman, B. G.  
750 Frenguelli, and D. G. Hardie, "Calmodulin-dependent protein kinase kinase-beta  
751 is an alternative upstream kinase for AMP-activated protein kinase," *Cell Metab*,  
752 vol. 2, no. 1, pp. 9-19, July2005.
- 753 [38] M. F. Calabrese, F. Rajamohan, M. S. Harris, N. L. Caspers, R. Magyar, J. M.  
754 Withka, H. Wang, K. A. Borzilleri, P. V. Sahasrabudhe, L. R. Hoth, K. F.  
755 Geoghegan, S. Han, J. Brown, T. A. Subashi, A. R. Reyes, R. K. Frisbie, J.  
756 Ward, R. A. Miller, J. A. Landro, A. T. Londregan, P. A. Carpino, S. Cabral, A. C.  
757 Smith, E. L. Conn, K. O. Cameron, X. Qiu, and R. G. Kurumbail, "Structural basis  
758 for AMPK activation: natural and synthetic ligands regulate kinase activity from  
759 opposite poles by different molecular mechanisms," *Structure.*, vol. 22, no. 8, pp.  
760 1161-1172, Aug.2014.
- 761 [39] B. J. Davis, Z. Xie, B. Violette, and M. H. Zou, "Activation of the AMP-activated  
762 kinase by antidiabetes drug metformin stimulates nitric oxide synthesis in vivo by  
763 promoting the association of heat shock protein 90 and endothelial nitric oxide  
764 synthase," *Diabetes*, vol. 55, no. 2, pp. 496-505, Feb.2006.
- 765 [40] D. Nagata, M. Mogi, and K. Walsh, "AMP-activated protein kinase (AMPK)  
766 signaling in endothelial cells is essential for angiogenesis in response to hypoxic  
767 stress," *J. Biol. Chem.*, vol. 278, no. 33, pp. 31000-31006, Aug.2003.
- 768 [41] A. Stempien-Otero, A. Karsan, C. J. Cornejo, H. Xiang, T. Eunson, R. S.  
769 Morrison, M. Kay, R. Winn, and J. Harlan, "Mechanisms of hypoxia-induced  
770 endothelial cell death. Role of p53 in apoptosis," *J. Biol. Chem.*, vol. 274, no. 12,  
771 pp. 8039-8045, Mar.1999.
- 772 [42] F. Jiang, "Autophagy in vascular endothelial cells," *Clin. Exp. Pharmacol.*  
773 *Physiol*, vol. 43, no. 11, pp. 1021-1028, Nov.2016.
- 774 [43] S. C. Nussenzweig, S. Verma, and T. Finkel, "The role of autophagy in vascular  
775 biology," *Circ. Res.*, vol. 116, no. 3, pp. 480-488, Jan.2015.

- 776 [44] G. R. De Meyer, M. O. Grootaert, C. F. Michiels, A. Kurdi, D. M. Schrijvers, and  
777 W. Martinet, "Autophagy in vascular disease," *Circ. Res.*, vol. 116, no. 3, pp.  
778 468-479, Jan.2015.
- 779 [45] Y. Xie, S. J. You, Y. L. Zhang, Q. Han, Y. J. Cao, X. S. Xu, Y. P. Yang, J. Li, and  
780 C. F. Liu, "Protective role of autophagy in AGE-induced early injury of human  
781 vascular endothelial cells," *Mol. Med. Rep.*, vol. 4, no. 3, pp. 459-464, May2011.
- 782 [46] L. Zhao, X. Wang, Y. Yu, L. Deng, L. Chen, X. Peng, C. Jiao, G. Gao, X. Tan, W.  
783 Pan, X. Ge, and P. Wang, "OTUB1 protein suppresses mTOR complex 1  
784 (mTORC1) activity by deubiquitinating the mTORC1 inhibitor DEPTOR," *J. Biol.*  
785 *Chem.*, vol. 293, no. 13, pp. 4883-4892, Mar.2018.
- 786 [47] E. Toton, A. Romaniuk, N. Konieczna, J. Hofmann, J. Barciszewski, and M.  
787 Rybczynska, "Impact of PKCepsilon downregulation on autophagy in  
788 glioblastoma cells," *BMC. Cancer*, vol. 18, no. 1, p. 185, Feb.2018.
- 789 [48] Y. Mochizuki, R. Ohashi, T. Kawamura, H. Iwanari, T. Kodama, M. Naito, and T.  
790 Hamakubo, "Phosphatidylinositol 3-phosphatase myotubularin-related protein 6  
791 (MTMR6) is regulated by small GTPase Rab1B in the early secretory and  
792 autophagic pathways," *J. Biol. Chem.*, vol. 288, no. 2, pp. 1009-1021, Jan.2013.
- 793 [49] H. Li, F. Yang, C. Liu, P. Xiao, Y. Xu, Z. Liang, C. Liu, H. Wang, W. Wang, W.  
794 Zheng, W. Zhang, X. Ma, D. He, X. Song, F. Cui, Z. Xu, F. Yi, J. P. Sun, and X.  
795 Yu, "Crystal Structure and Substrate Specificity of PTPN12," *Cell Rep.*, vol. 15,  
796 no. 6, pp. 1345-1358, May2016.
- 797 [50] N. G. Selner, R. Luechapanichkul, X. Chen, B. G. Neel, Z. Y. Zhang, S. Knapp,  
798 C. E. Bell, and D. Pei, "Diverse levels of sequence selectivity and catalytic  
799 efficiency of protein-tyrosine phosphatases," *Biochemistry*, vol. 53, no. 2, pp.  
800 397-412, Jan.2014.
- 801 [51] M. Rechsteiner and S. W. Rogers, "PEST sequences and regulation by  
802 proteolysis," *Trends Biochem. Sci.*, vol. 21, no. 7, pp. 267-271, July1996.
- 803 [52] M. M. Garcia-Alai, M. Gallo, M. Salame, D. E. Wetzler, A. A. McBride, M. Paci,  
804 D. O. Cicero, and G. de Prat-Gay, "Molecular basis for phosphorylation-  
805 dependent, PEST-mediated protein turnover," *Structure.*, vol. 14, no. 2, pp. 309-  
806 319, Feb.2006.
- 807 [53] T. Ravid and M. Hochstrasser, "Diversity of degradation signals in the ubiquitin-  
808 proteasome system," *Nat. Rev. Mol. Cell Biol.*, vol. 9, no. 9, pp. 679-690,  
809 Sept.2008.
- 810 [54] M. J. Strowitzki, E. P. Cummins, and C. T. Taylor, "Protein Hydroxylation by  
811 Hypoxia-Inducible Factor (HIF) Hydroxylases: Unique or Ubiquitous?," *Cells*, vol.  
812 8, no. 5 Apr.2019.  
813  
814

**Figure 1**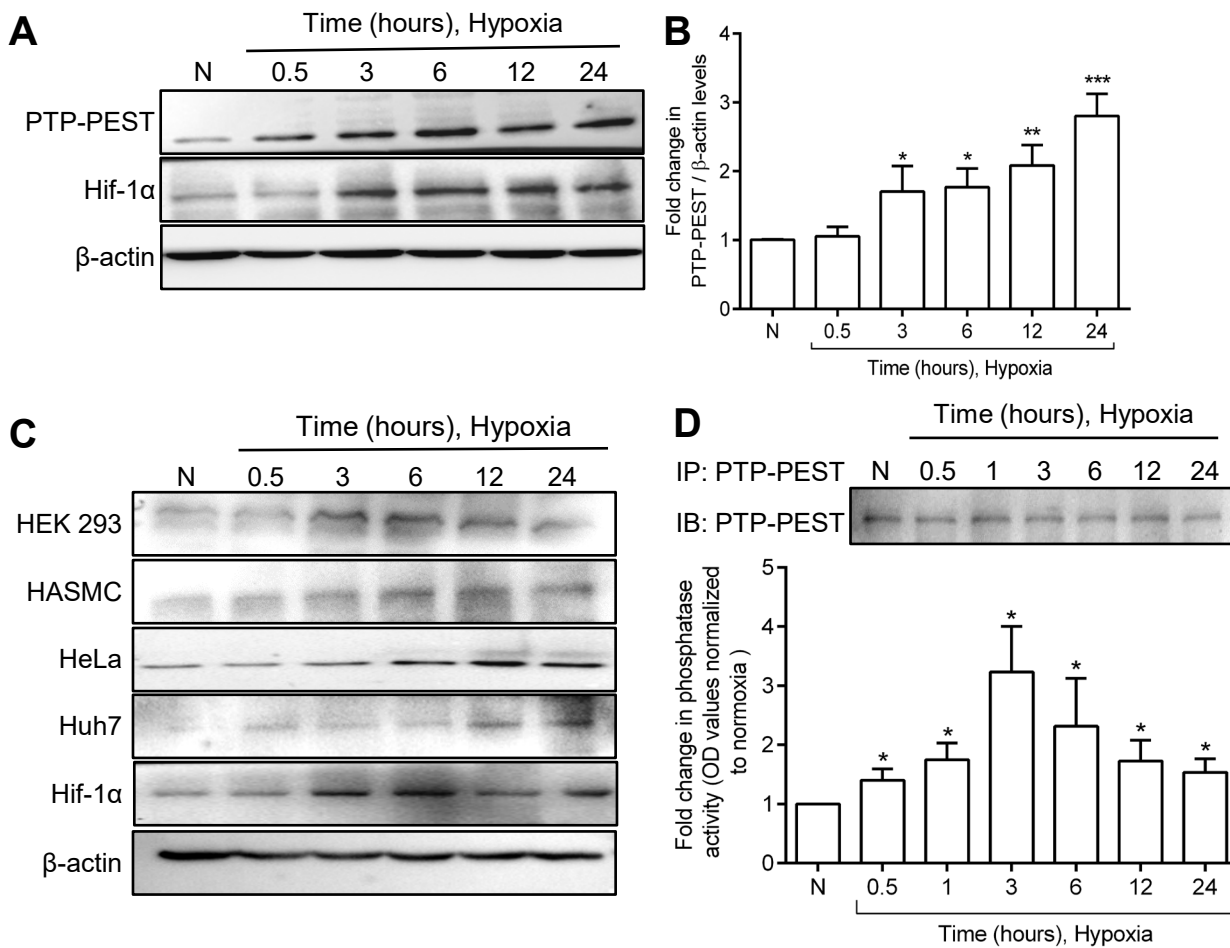



# Figure 2

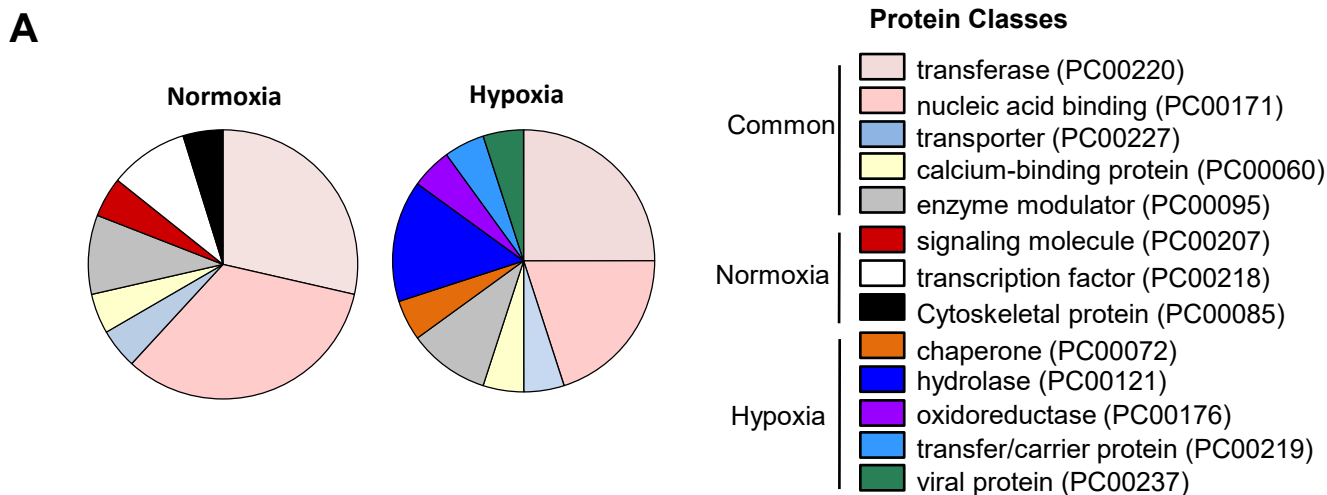

**B**

| Normoxia                                                                                                                                                                                                                                                                                                                                                                                                                                                                                                                                                                            | Hypoxia                                                                                                                                                                                                                                                                                                                                                                                                                                                                                                                                                                          |
|-------------------------------------------------------------------------------------------------------------------------------------------------------------------------------------------------------------------------------------------------------------------------------------------------------------------------------------------------------------------------------------------------------------------------------------------------------------------------------------------------------------------------------------------------------------------------------------|----------------------------------------------------------------------------------------------------------------------------------------------------------------------------------------------------------------------------------------------------------------------------------------------------------------------------------------------------------------------------------------------------------------------------------------------------------------------------------------------------------------------------------------------------------------------------------|
| <ul style="list-style-type: none"> <li>• <b>AMPK<math>\alpha_1</math></b> [Q13131]</li> <li>• <b>AMPK<math>\alpha_2</math></b> [P54646]</li> <li>• ATP-binding cassette sub-family C member 11 [Q96J66]</li> <li>• Cell cycle and apoptosis regulator protein 2 [Q8N163]</li> <li>• Cyclin-G1 [P51956]</li> <li>• Cystatin-A [P01040]</li> <li>• Dimethyladenosine transferase 1, mitochondrial [Q8WVM0]</li> <li>• DNA Topoisomerase 1 [P11387]</li> <li>• Geranylgeranyl transferase type-2 subunit alpha [Q92696]</li> <li>• Rho-associated protein kinase 2 [O75116]</li> </ul> | <ul style="list-style-type: none"> <li>• Bcl-2-like protein 2 Isoform 3 [Q92843-2]</li> <li>• Dual oxidase 2 [Q9NRD8]</li> <li>• Glycine receptor subunit beta [P48167]</li> <li>• mRNA-capping enzyme [O60942]</li> <li>• Myotubularin-related protein 6 [Q9Y217]</li> <li>• <b>Phosphoglycerate kinase 1</b>[P00558]</li> <li>• <b>Protein kinase C epsilon type</b> [Q02156]</li> <li>• Ral GTPase-activating protein subunit alpha-2 [Q2PPJ7]</li> <li>• Sarcolemmal membrane associated protein [Q14BN4]</li> <li>• <b>Ubiquitin thioesterase OTUB1</b> [Q96FW1]</li> </ul> |

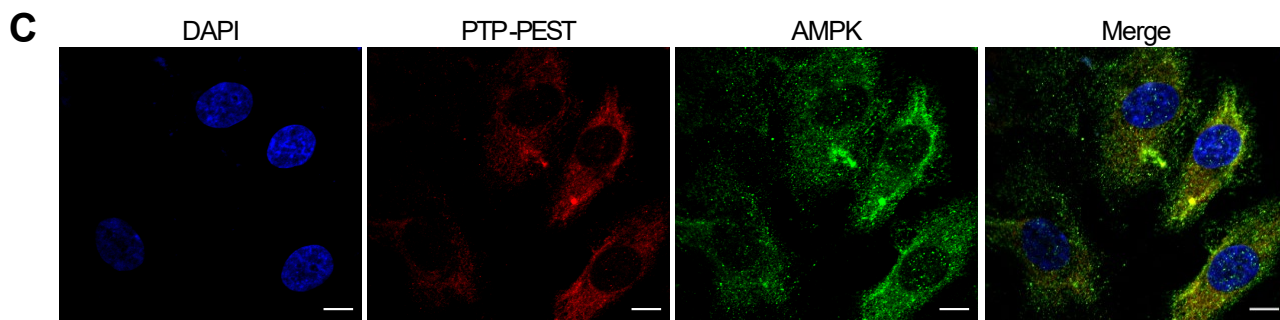



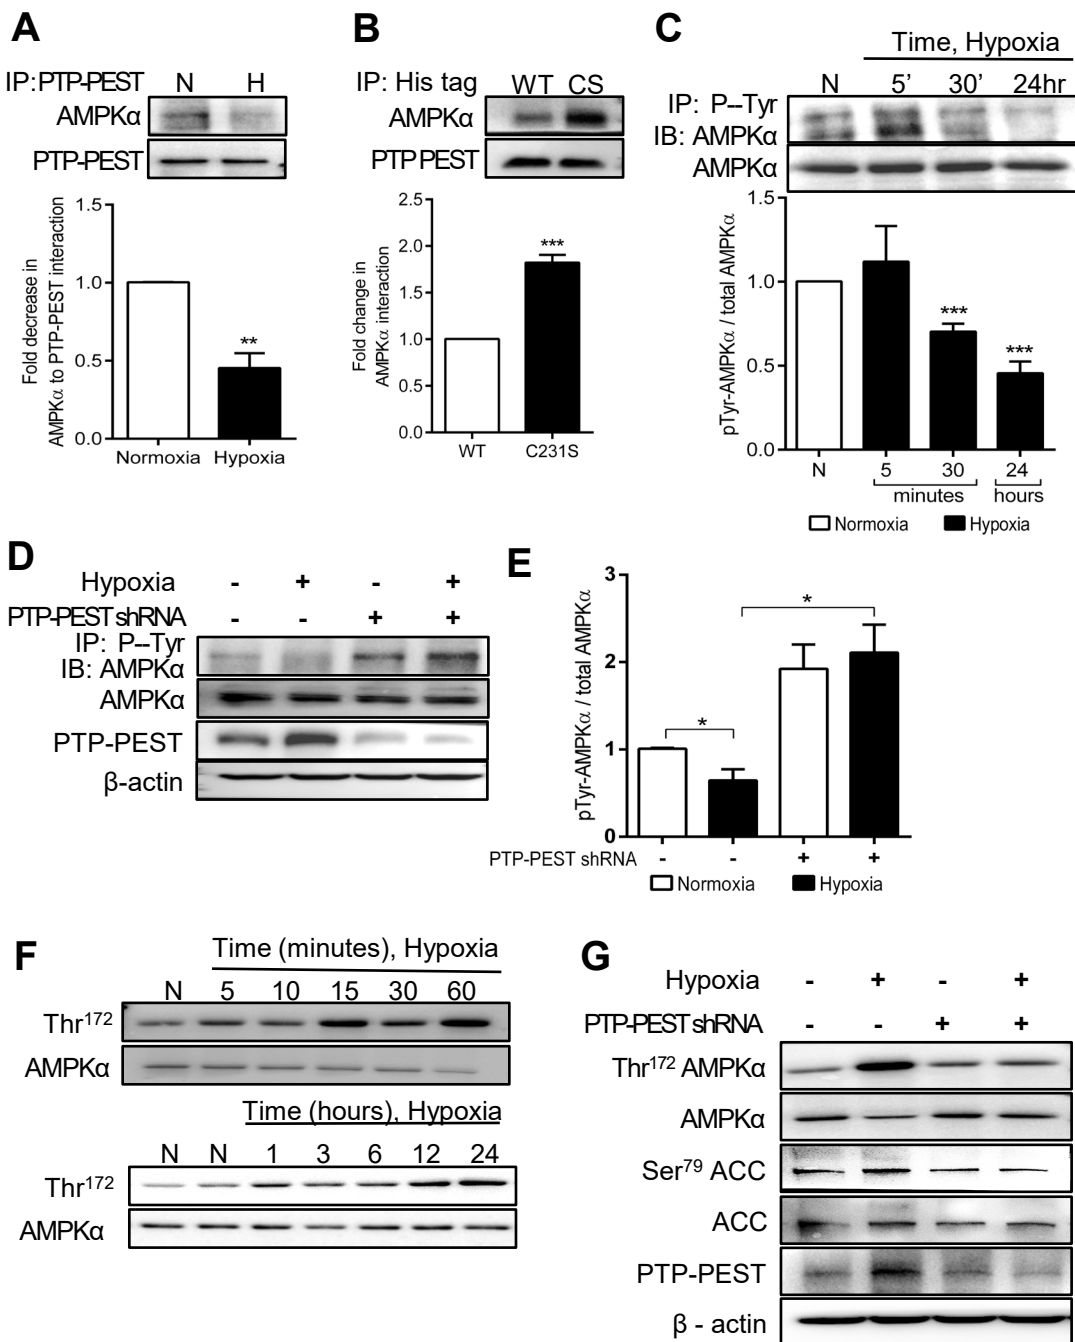

**Figure 4**

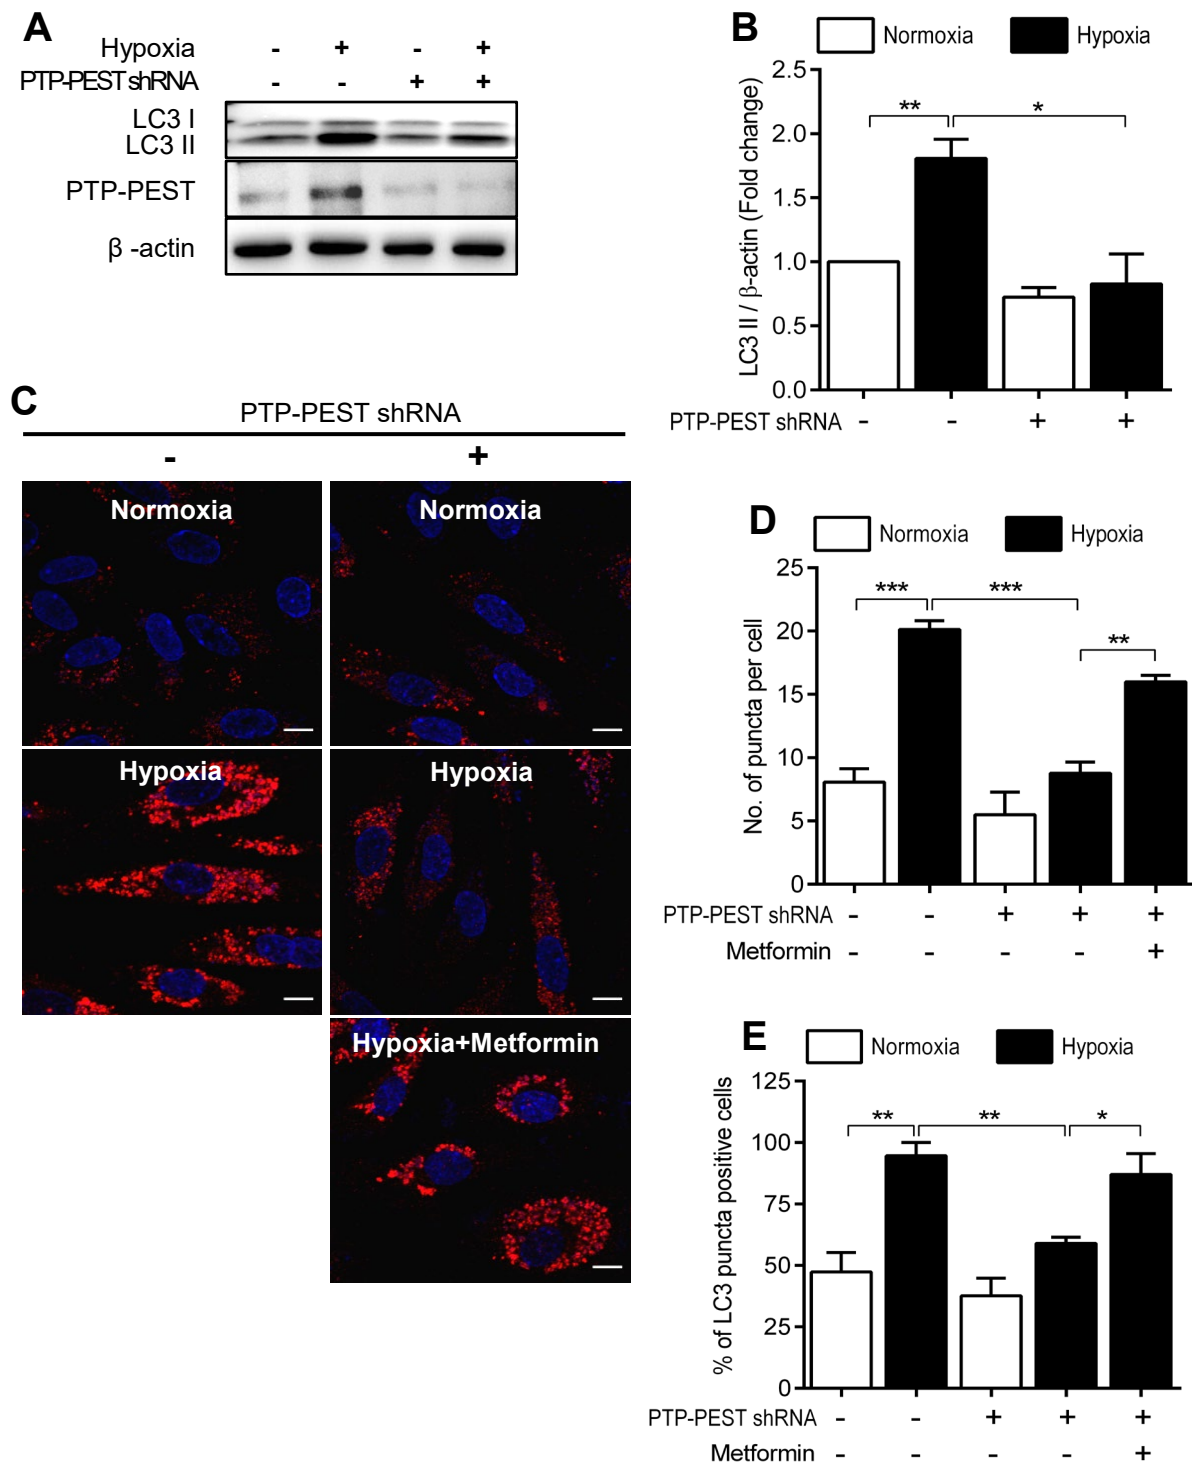

**Figure 5**

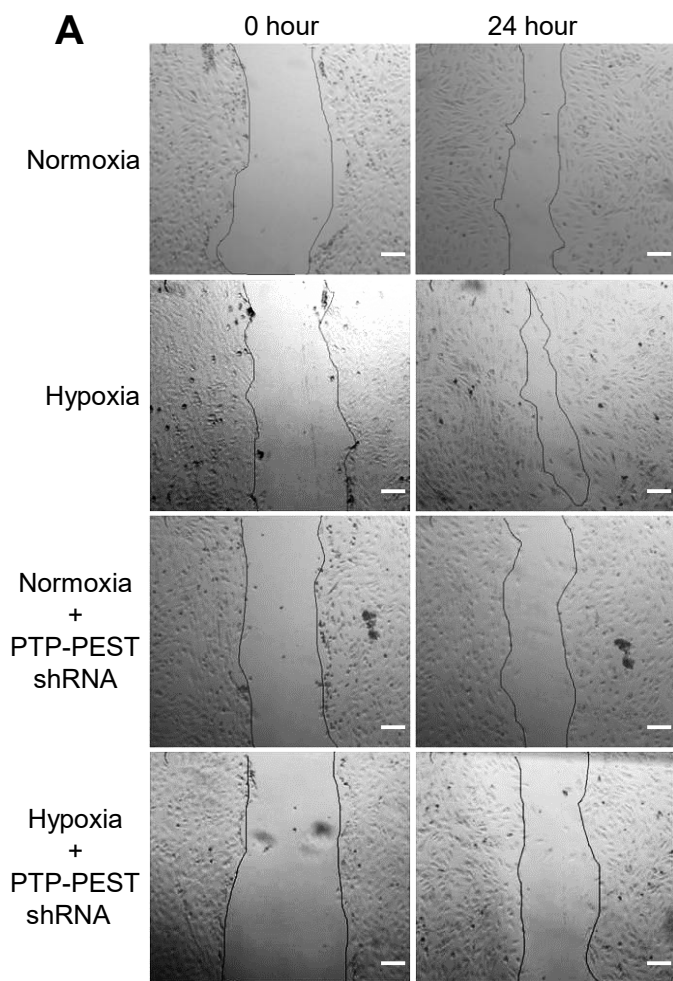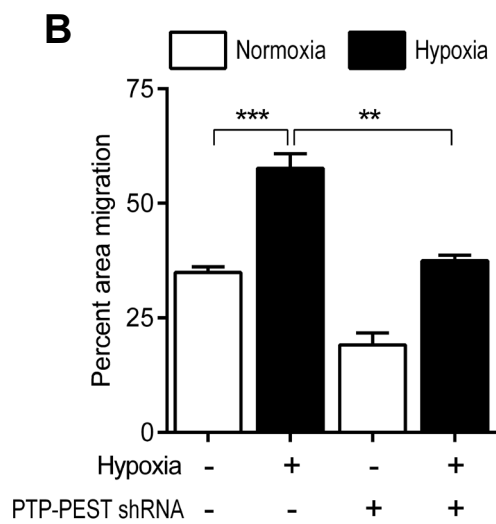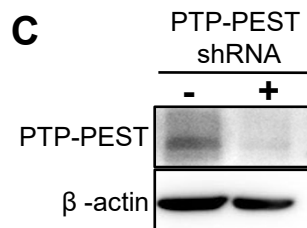

**Figure 6**

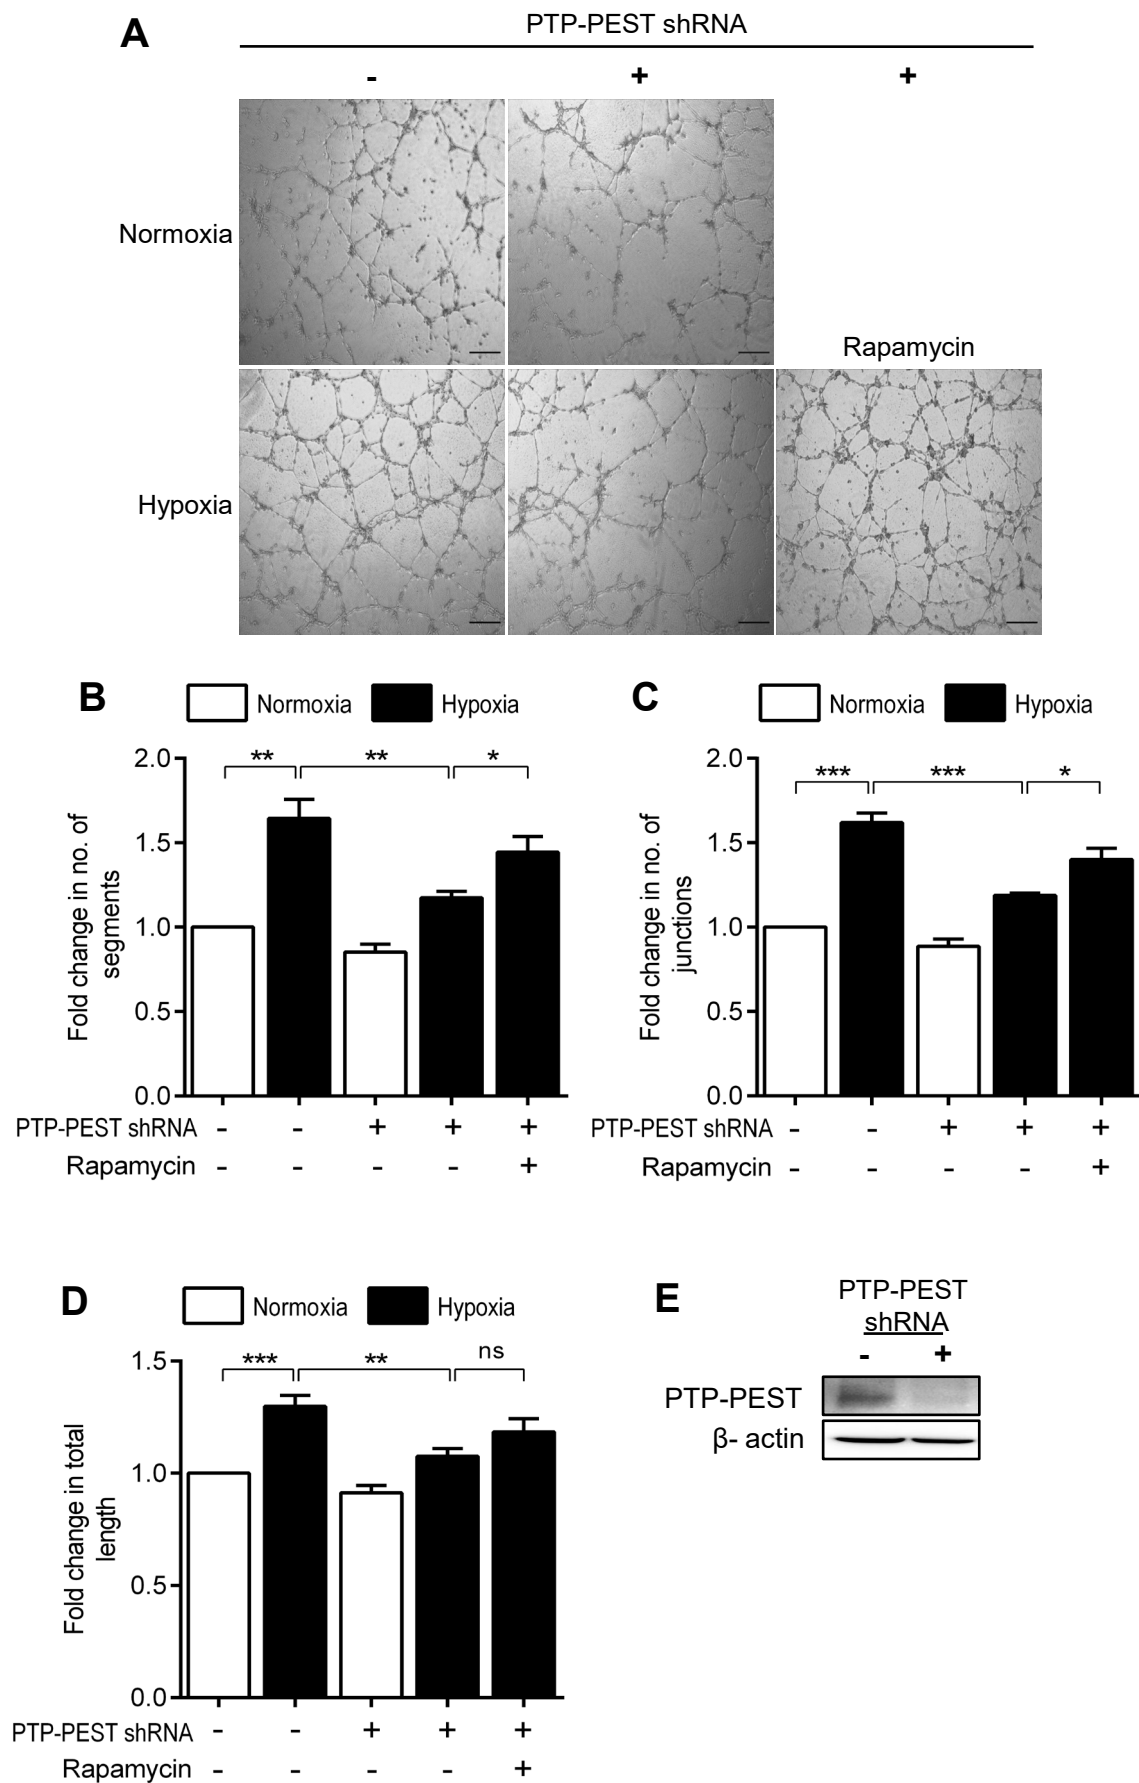

A

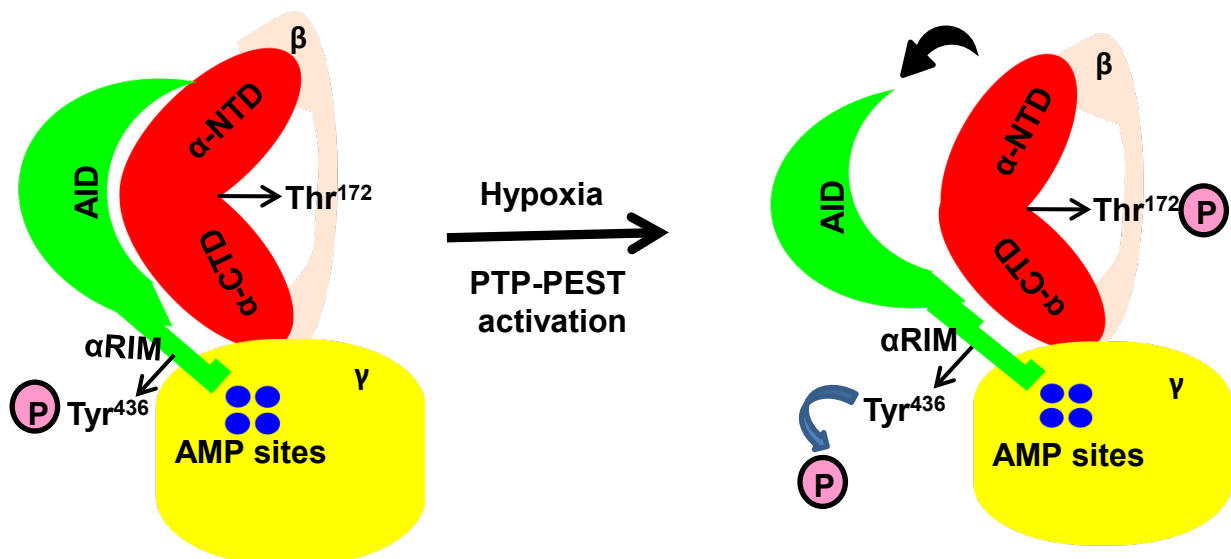

Source: https://www.biorxiv.org/content/10.1101/2020.06.15.152942v1.full.pdf
